# Supplementary material
Source: Springer Nature journal article supplement (https://www.springermedizin.de/resource/supplementary/13014_2013_900_MOESM5_ESM.pdf/9634390)

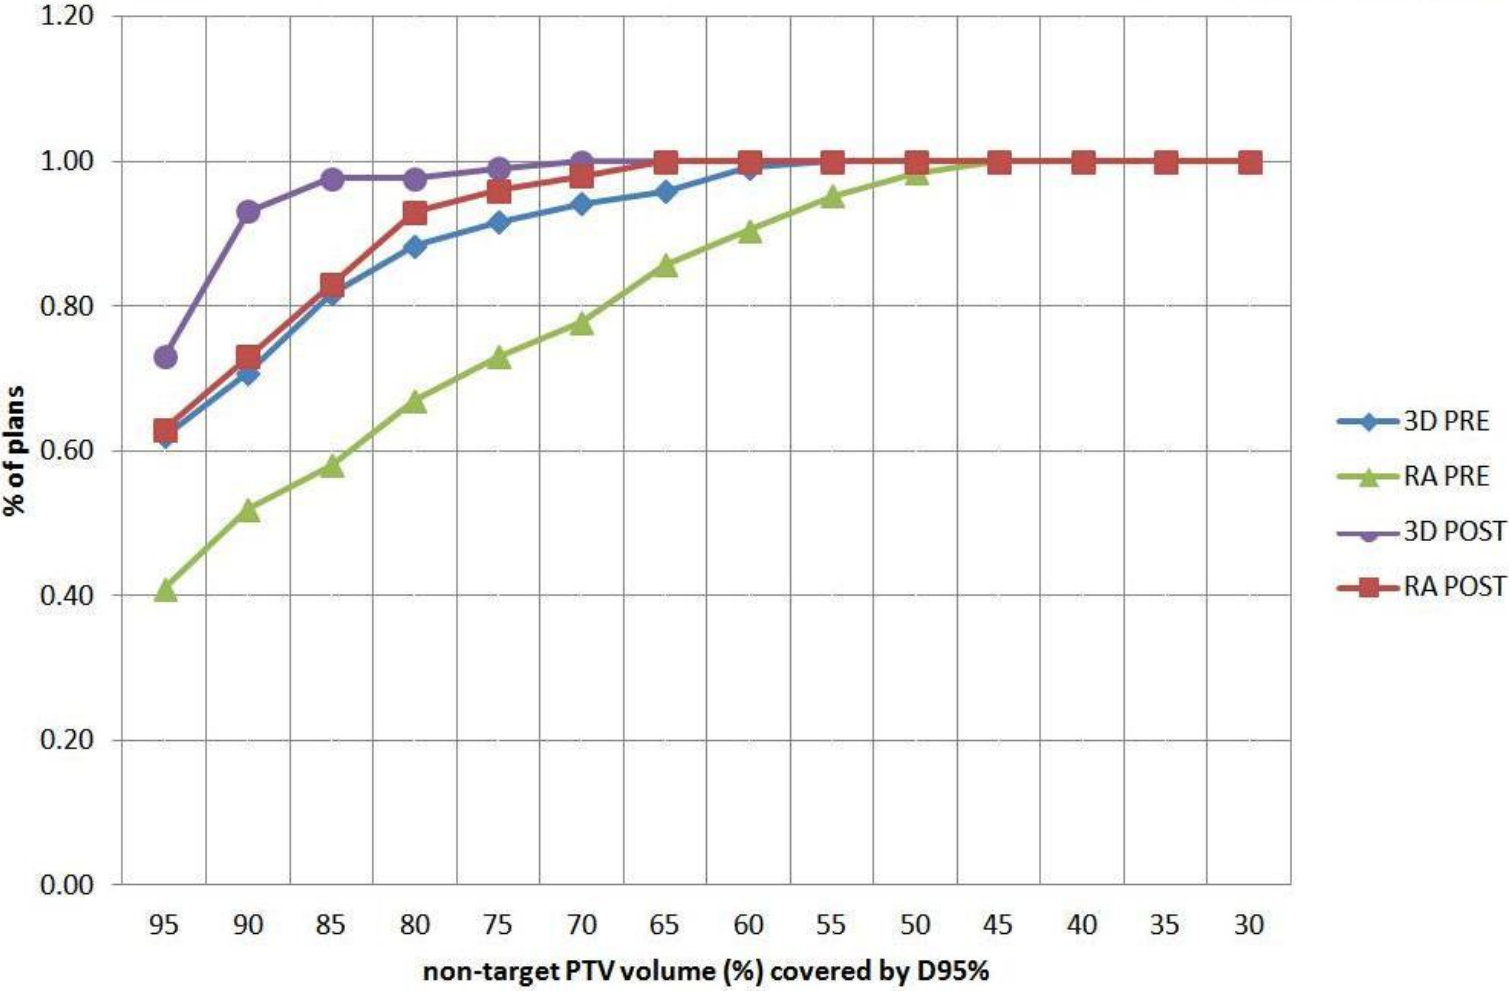

Supplement: MOESM5 [file 9634390]
